# Supplementary material for: Poly(A)-seq: A method for direct sequencing and analysis of the transcriptomic poly(A)-tails
Source: PubMed Central journal article supplement (PMC7297374; doi:10.1371/journal.pone.0234696), 2020-06-16

**A**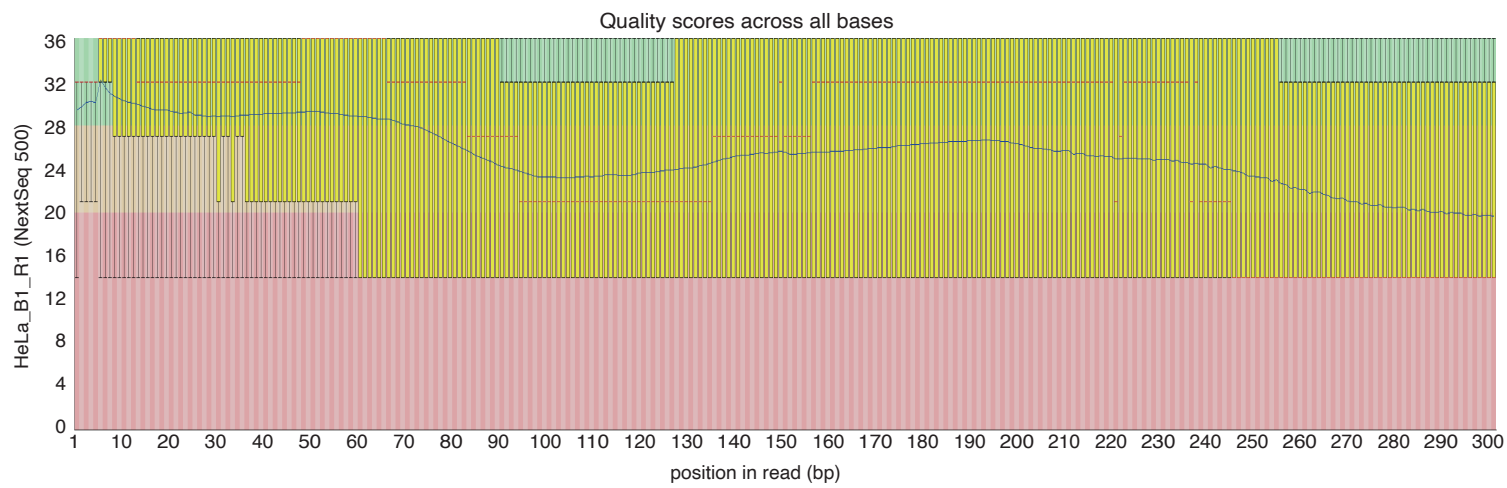**B**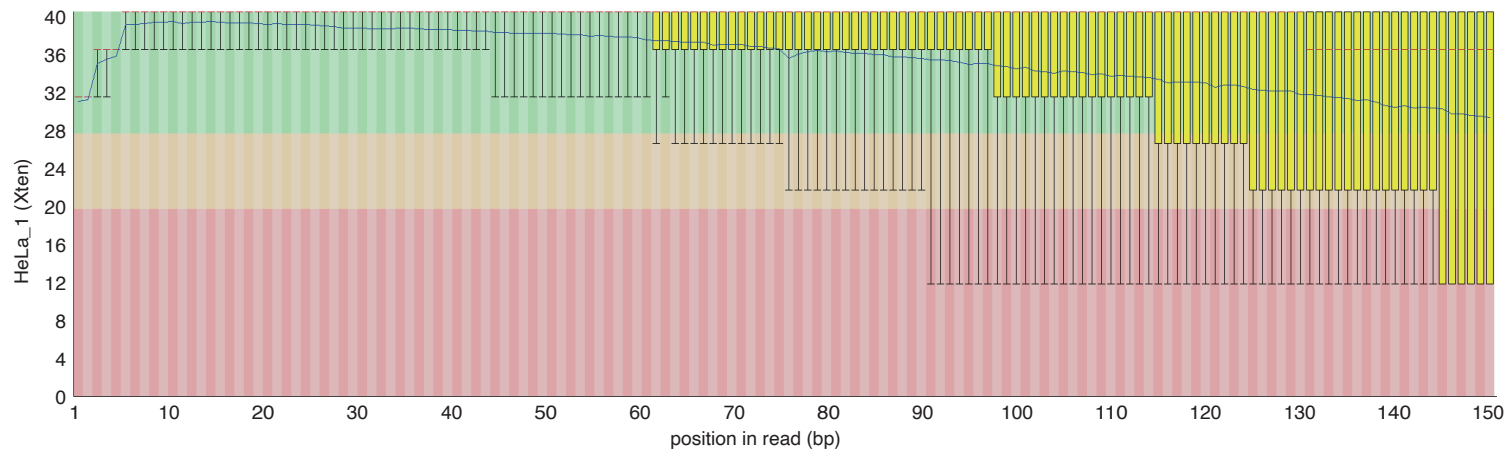**C**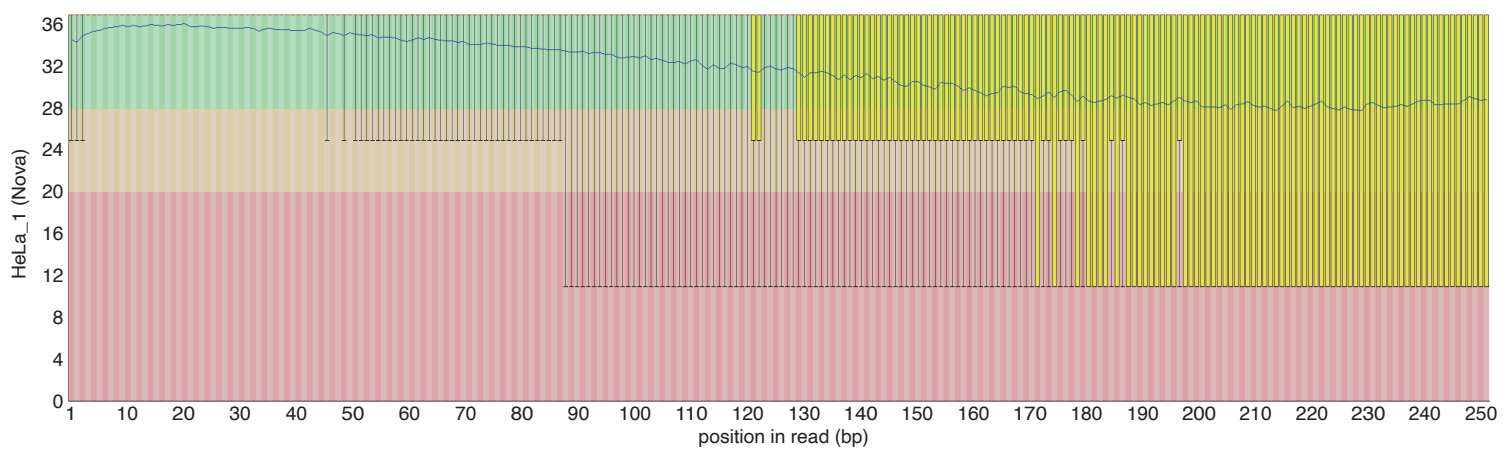

Supplement: pone.0234696.s009.pdf [file pone.0234696.s009.pdf]
